# Supplementary material for: Effect of Unsaturated Fatty Acids on Intra-Metabolites and Aroma Compounds of Saccharomyces cerevisiae in Wine Fermentation
Source: Foods. 2021 Jan 30;10(2):277. doi: 10.3390/foods10020277 (PMC7912517; doi:10.3390/foods10020277)
Supplement: Supplementary file 1 [file foods-10-00277-s001.xlsx]

## Sheet: Table S1
Table S1 Calibration curves for quantification of glycerol, ethanol, acetic acid, citric acid, succinic acid and malic acid in this study.
Compound	CAS	Calibration curves a	R2 b
Glycerol	56815	y=4E-06x-0.0241	0.9999
Ethanol	64175	y=1E-06x+0.1128	0.9998
Acetic acid	64197	y=2E-03x-0.0113	0.9998
Citric acid	77929	y=6E-04x-0.0087	0.9999
Succinic acid	110156	y=1E-03x-0.0082	0.9998
Malic acid	6915157	y=6E-04x-0.0822	0.9997
a y, concentration in mg/l; x, peak area
b R, regression coefficient.

## Sheet: Table S2
Table S2 Quantitative and quantificative information of fatty acids in this study.
Compound	CAS	RI a	Quantitative ion b (m/z)	Quantitative standards	ID c	Calibration curves d	R² e
Dodecanoic acid	143077	1002	74	Dodecanoic acid	A	y=3.802x-0.084	0.96
Tetradecanoic acid	544638	1106	74	Tetradecanoic acid	A	y=4.128x-0.085	0.981
Hexadecanoic acid	57103	1149	74	Hexadecanoic acid	A	y=5.252x-1.063	0.991
9-Hexadecenoic acid	373499	1173	55	9-Hexadecenoic acid	A	y=4.4712x-0.035	0.993
Octadecanoic acid	57114	1202	74	Octadecanoic acid	A	y=4.725x-0.416	0.995
Oleic acid	112801	1209	55	Oleic acid	A	y=12.41x-0.546	0.996
Linoleic acid	60333	1223	67	Linoleic acid	A	y=12.31x+0.108	0.999
α-Linolenic acid	463401	1246	79	α-Linolenic acid	A	y=12.43x-0.397	0.997
Eicosanoic acid	506309	1266	74	Eicosanoic acid	A	y=5.687x-0.066	0.962
Docosanoic acid	112856	1363	74	Docosanoic acid	A	y=6.670x-0.546	0.952
a Retention indices were calculated on an HP-INNOWAX column.
b Quantitative ion for peak area evaluation of fatty acids.
c Identification of volatile compounds: A, identified by mass spectrum and RI agreed with standards; B, identified by mass spectrum agrees with the mass spectral database and RI agrees with literature.
d y, concentration in mg/L; x, peak area ratio of a compound to the internal standard (Nonadecanoic acid).
e Regression coefficient.

## Sheet: Table S3
Table S3 Quantitative ion, quantitative standards and calibration curves for quantification of volatile compounds in this study.
Compound	CAS	RI a	Quantitative ion b (m/z)	Quantitative standards	ID c	Calibration curves d	R² e	Thredsholds (μg/L) f
1-Hexanol	111273	1354	56	1-Hexanol	A	y=2494.27x+22.29	0.998	1100
(E)-3-Hexen-1-ol	928972	1360	41	(E)-3-Hexen-1-ol	A	y=501.29x+2.64	0.992	1000
(Z)-3-Hexen-1-ol	928961	1381	67	(Z)-3-Hexen-1-ol	A	y=8163.18x+26.86	0.997	1000
1-Propanol	71238	1057	31	1-Propanol	A	y=125.08x-8.24	0.991	306000
Isobutyl alcohol	78831	1111	43	Isobutyl alcohol	A	y=26107.24x+1550.13	0.999	40000
Isoamyl alcohol	123513	1220	55	Isoamyl alcohol	A	y=13812.49x-1321.38	0.999	60000
2,3-Butanediol	513859	1542	45	2,3-Butanediol	A	y=261.3x+78.86	0.998	150000
1-Octanol	111875	1558	56	1-Octanol	A	y=511.60x-1.35	0.984	800
1-Octyl-3-ol	3391864	1448	57	1-Octyl-3-ol	A	y=220.97x+4.01	0.997
1-Decanol	112301	1765	70	1-Decanol	A	y=173.45x+1.59	0.997	400
Benzyl alcohol	100516	1891	79	Benzyl alcohol	A	y=424654.7x-546.04	0.965	200000
2-Phenylethanol	60128	1928	91	2-Phenylethanol	A	y=11861.14x+254.13	0.997	10000
Ethyl acetate	141786	789	43	Ethyl acetate	A	y=10856.40x-2883.83	0.997	7500
Isoamyl acetate	123922	1122	43	Isoamyl acetate	A	y=283.54x-108.63	0.995	160
Hexyl acetate	142927	1275	43	Hexyl acetate	A	y=102.43x-6.98	0.996	1500
Phenethyl acetate	103457	1830	104	Phenethyl acetate	A	y=195.05x-11.15	0.992	250
Hexanoic acid	142621	1860	60	Hexanoic acid	A	y=880.99x+19.41	0.986	420
Octanoic acid	124072	2075	60	Octanoic acid	A	y=4598.59x-429.53	0.922	500
Decanoic acid	334485	2292	60	Decanoic acid	A	y=2035.66x+41.34	0.997	1000
Isobutyric acid	503742	1683	60	Isobutyric acid	A	y=79324.27x+18.09	0.974	3000
Ethyl butanoate	105544	1047	71	Ethyl butanoate	A	y=1027.48x+5.47	0.999	400
Ethyl hexanoate	123660	1232	88	Ethyl hexanoate	A	y=232.00x-135.27	0.997	80
Ethyl octanoate	106321	1437	88	Ethyl octanoate	A	y=132.31x-274.07	0.997	2
Ethyl decanoate	110383	1639	88	Ethyl decanoate	A	y=135.15x-462.83	0.967	200
Ethyl dodecanoate	106332	1830	88	Ethyl dodecanoate	A	y=53.45x+4.75	0.982	1500
Ethyl tetradecanoate	124061	2050	88	Ethyl dodecanoate	B	y=53.45x+4.75	0.982	2000
Ethyl hexadecanoate	628977	2238	88	Ethyl dodecanoate	B	y=53.45x+4.75	0.982	1000
Methyl octanoate	111115	1394	74	Methyl octanoate	A	y=33.42x+0.05	0.997	200
Isoamyl hexanoate	2198610	1482	70	Isoamyl hexanoate	A	y=32.09x+1.11	0.99
Propyl octanoate	624135	1524	43	Ethyl octanoate	B	y=132.31x-274.07	0.997	125
Citronellol	106229	1771	69	Citronellol	A	y=8.88x+0.35	0.995	100
β-Damascenone	23726934	1835	69	β-Damascenone	A	y=148.66x+1.44	0.999	0.14
3-(Methylthio)-1-propanol	505102	1724	106	3-(Methylthio)-1-propanol	A	y=57644.86x-46.05	0.993	1000
a Retention indices were calculated on an HP-INNOWAX column.
b Quantitative ion for peak area evaluation of volatile compounds.
c Identification of volatile compounds: A, identified by mass spectrum and RI agreed with standards; B, identified by mass spectrum agrees with the mass spectral database and RI agrees with literature.
d y, concentration in μg/L; x, peak area ratio of a compound to the internal standard (4-methyl-2-pentanol).
e Regression coefficient.
f References: Duan et al., 2015; Peinado, Moreno, Bueno, Moreno, & Mauricio, 2004; Franco, Peinado, Medina, & Moreno, 2004; Guth, 1997; Sánchez-Palomo, García-Carpintero, Alonso-Villegas, & González-Viñas, 2010; Peinado, Mauricio, & Moreno, 2006; Ferreira, López, & Cacho, 2000; Noguerol-Pato, González-Álvarez, González-Barreiro, Cancho-Grande, & Simal-Gándara, 2012; Cai et al., 2014; Zea, Moyano,…
References list
Cai, J., Zhu, B., Wang, Y., Lu, L., Lan, Y., Reeves, M., & Duan, C. (2014). Influence of pre-fermentation cold maceration treatment on aroma compounds of Cabernet Sauvignon wines fermented in different industrial scale fermenters. Food Chemistry, 154: 217–229.
Duan, L. L., Shi, Y., Jiang, R., Yang, Q., Wang, Y. Q., Liu, P. T., Duan, C. Q., & Yan, G. L. (2015). Effects of adding unsaturated fatty acids on fatty acid composition of Saccharomyces cerevisiae and major volatile compounds in wine. South African Journal for Enology and Viticulture, 36(2), 285–295.
Ferreira, V., López, R., & Cacho, J. F. (2000). Quantitative determination of the odorants of young red wines from different grape varieties. Journal of the Science of Food and Agriculture, 80(11): 1659–1667.
Franco, M., Peinado, A., Medina, M., & Moreno, J. (2004). Off-vine grape drying effect on volatile compounds and aromatic series in must from Pedro Ximenez grape variety. Journal of Agricultural and Food Chemistry, 52: 3905–3910.
Guth H. (1997). Quantitation and sensory studies of character impact odorants of different white wine varieties. Journal of Agricultural and Food Chemistry, 43: 3027–3032.
Jiang, B., & Zhang, Z. (2010). Volatile compounds of young wines from Cabernet sauvignon, Cabernet gernischet and Chardonnay varieties grown in the loess plateau region of China. Molecules, 15(12): 9184–9196.
Noguerol-Pato, R., González-Álvarez, M., González-Barreiro, C., Cancho-Grande, B., & Simal-Gándara, J. (2012). Aroma profile of Garnacha Tintorera-based sweet wines by chromatographic and sensorial analyses. Food Chemistry, 134(4): 2313–25.
Peinado, R. A., Mauricio, J. C., & Moreno, J. (2006). Aromatic series in sherry wines with gluconic acid subjected to different biological aging conditions by Saccharomyces cerevisiae var. capensis. Food Chemistry, 94(2): 232–239.
Peinado, R. A., Moreno, J., Bueno, J. E., Moreno, J. A., & Mauricio, J. C. (2004). Comparative study of aromatic compounds in two young white wines subjected to pre-fermentative cryomaceration. Food Chemistry, 84(4): 585–590.
Sánchez-Palomo, E., García-Carpintero, E., Alonso-Villegas, R., & González-Viñas, M. A. (2010). Characterization of aroma compounds of Verdejo white wines from the La Mancha region by odour activity values. Flavour and Fragrance Journal, 25(6): 456-462.
Zea, L., Moyano, L., Moreno, J., Cortes, B., & Medina, M. (2001). Discrimination of the aroma fraction of Sherry wines obtained by oxidative and biological ageing. Food Chemistry, 75(1): 79–84.

## Sheet: Table S4
Table S4 Quantitative and quantificative information of yeast intracellular amino acids in this study.
Compound	CAS	RI a	Quantitative ion (m/z) (+)	Calibration curves b	R² c
Glutamine	56860	6.05	149.137	y=4.9E-08x-0.45	0.998
Lysine	56871	7.15	148.196	y=2.1E-08x+0.69	0.999
Glutamate	56859	6.21	148.152	y=1.7E-07x-3.42	0.986
Asparagine	617458	6.34	134.126	y=1.1E-08x-0.74	0.998
Valine	516063	5.18	119.154	y=3.4E-08x-7.56	0.956
Aspartic acid	6899032	6.64	135.111	y=7.5E-08x-0.63	0.995
Alanine	56417	5.77	91.1011	y=1.4E-07x-1.39	0.992
Serine	56451	6.25	107.1	y=1.2E-07x-1.34	0.996
Phenylalanine	63912	4.66	167.197	y=1.1E-08x-0.21	0.998
Methionine	59518	5.04	151.219	y=2.5E-08x-0.16	0.998
Leucine	61905	4.8	133.181	y=6.9E-09x-0.44	0.999
Arginine	74793	7.07	176.209	y=5.5E-09x-0.03	0.987
Proline	609369	5.21	117.138	y=1.1E-08x-0.83	0.997
Isoleucine	73325	4.8	133.181	y=6.9E-09x-0.42	0.998
Citrulline	372758	6.39	177.194	y=1.9E-08x+2.09	0.989
Threonine	80682	5.99	121.127	y=6.5E-08x-0.49	0.996
Glycine	112898030	6.01	77.0745	y=6.8E-07x+0.63	0.993
Tyrosine	60184	5.32	183.196	y=5.7E-08x-0.04	0.998
Histidine	71001	7.17	157.162	y=9.5E-09x+1.23	0.998
Ornithine	70268	7.21	134.169	y=2.8E-08x+1.57	0.998
Tryptophan	73223	4.74	206.233	y=1.9E-08x+0.25	0.999
γ-Aminobutyric acid	56122	4.9	105.128	y=2.5E-08x-1.14	0.997
a Retention indices were calculated on an ACQUITY UPLC BEH Amide column.
b y, concentration in mg/L; x, peak area.
c Regression coefficient.

## Sheet: Table S5
Table S5 Quantitative and quantificative information of yeast intracellular compounds involved in glycolysis, tricarboxylic acid cycle and energy metabolism in this study.
Compound	CAS	RI a	Quantitative ion b (m/z) (-)	Calibration curves c	R² d
Coenzyme A	85610	4.23	766.526	y=3.4E-08x+2.44	0.995
Acetyl CoA	72899	4.42	808.563	y=9.1E-08x-1.08	0.998
Malonyl-CoA	524141	4.32	852.572	y=6.5E-07x+2.62	0.998
Fructose-6-phosphate	643130	0.8	259.128	y=1.8E-08x-3.19	0.956
Glycerol 3-phosphate	17989412	0.84	171.066	y=1E-08x_0.16	0.999
ADP	58640	1.07	426.193	y=6E-08x-0.67	0.985
ATP	56655	1.28	506.173	y=3.2E-08x+3.17	0.992
NADH	58684	4.1	664.433	y=2.4E-08x+1	0.994
NADPH	57045	4.07	744.413	y=1E-07x+1.58	0.997
3-Phosphoglyceric acid	820111	0.8	186.057	y=8.5E-07x-2.69	0.982
2-Phosphoglyceric acid	2553593	0.86	185.049	y=1.4E-08x-2.3	0.986
Fructose-1,6-bisphosphate	488697	0.92	336.084	y=2.7E-07x+2.63	0.998
Dihydroxyacetone phosphate	57045	0.89	169.05	y=3.4E-08x-0.19	0.996
Phosphoenolpyruvic acid	138089	0.93	167.034	y=1.3E-08x-0.96	0.994
NAD	20111186	4.1	663.425	y=2.4E-08x+1.05	0.993
NADP	53598	4.07	743.405	y=1E-07x+1.58	0.997
Pyruvic acid	127173	1.85	87.0541	y=1.5E-08x-1.92	0.998
α-ketoglutaric acid	328507	1.32	145.09	y=1.9E-08x-1.18	0.993
Fumaric acid	110178	2.3	115.064	y=4.7E-08x-0.32	0.999
Malic acid	6915157	1.2	133.079	y=1.8E-08x-2.81	0.957
Succinic acid	110156	2.68	117.08	y=2.9E-08x-0.89	0.997
Citric acid	77929	1.23	191.116	y=8.8E-09x-0.89	0.998
a Retention indices were calculated on an ACQUITY UPLC HSS T3 C18 column.
b Quantitative ion for peak area evaluation of volatile compounds.
c y, concentration in mg/L; x, peak area.
d Regression coefficient.

## Sheet: Table S6
Table S6 Description of genes detected in this work.
Gene name	Open reading frame (ORF)	Description	F	R
EEB1	YPL095C	Acyl-coenzymeA:ethanol O-acyltransferase	AGCCATGAGCCTCTCATCAGG	TGAGCAACCTCTAGCATTAAGGAC
EHT1	YBR177C	Acyl-coenzymeA:ethanol O-acyltransferase	ACCGCTGACTGGCTCATAGATTC	ATGTGTCGCCTTCTCGTCTTC
Housekeeper
ACT1	YFL039C	Actin	TCTGAGGTTGCTGCTTTGGT	GGTGTCTTGGTCTACCGACGAT
PDA1	YER178W	Pyruvate dehydrogenase alpha	CTCCAGGCTTCTATGGTGGTAATGG	AGAGCAGGCGTCTTCGTTCTTG

## Sheet: Table S7
Table S7 Effect of different levels of UFAs on volatile compounds in wine after alcoholic fermentation.
Compounds	E_Control	E_L	E_H	B_Control	B_L	B_H
C6 alcohols
1-Hexanol	34.54±4.37a	78.27±6.83b	303.1±27.51c	39.2±5.18a	83.45±11.28b	388.63±13.12d
(E)-3-Hexen-1-ol	131.11±0.91ab	135.78±2.43a	141.65±6.69c	127.45±4.08b	131.55±1.68ab	144.67±6.57c
(Z)-3-Hexen-1-ol	319.48±2.8a	323.6±4.13ab	328.85±7.62bc	320.62±7.59a	320.18±2.03a	333.73±8.68c
Total C6 alcohols	485.13±6.04ab	537.65±12.45ab	622.05±180.64bc	474.2±31.57a	535.18±14.06ab	737.49±206.56c
Higher alcohols
1-Propanol	60.21±7.12a	80.26±11.07b	106.75±14c	86.61±2.44b	88.38±12.48b	59.24±8.99a
Isobutyl alcohol	31871.73±2919.77a	47293.28±6009.7b	72352.21±9529.63c	43621.55±7225.14b	50248.61±7479.41b	106570.86±11051.66d
Isoamyl alcohol	295053.56±28923.46a	411086.06±45136.76bc	524722.87±65581.91d	355384.31±13658.19b	448630.97±56928.86c	645458.47±72205.9e
2,3-Butanediol	372.25±23.15a	518.71±65.95b	230±6.81c	141.8±20.61d	291.72±24.28e	308.8±18.79e
1-Octanol	40.02±0.37a	42.18±0.34a	84.63±8.98b	39.63±0.76a	42.86±0.68a	101.88±13.6c
1-Octyl-3-ol	48.13±0.11a	47.76±0.05a	42.58±1.93b	48.1±0.13a	47.76±0.11a	41.73±1.83b
1-Decanol	4.95±0.52a	6.28±0.88ab	12.78±1.86c	6.08±0.44ab	7.2±0.94b	22.28±2.66d
Benzyl alcohol	248.89±21.45a	238.84±34.47a	248.73±33.12a	263.42±35.21a	263.59±28.93a	324.84±10.77b
2-Phenylethanol	62262.5±8293.02a	72113.05±8592.41b	75468.89±11072.31b	91043.14±9288.17c	87548.89±8662.29c	106829.45±5673.91d
Total higher alcohols	369038.79±61547.34a	511300.26±48089.61b	680041.84±82435.5c	428897.33±63660.07a	587169.06±71449.7b	838110.34±117400.85d
Acetate esters
Ethyl acetate	48836.32±3834.08a	37402.59±2851.8b	34868.58±4531.8b	67402.01±9098.74c	37677.61±3697.74b	34210.69±2563.06b
Isoamyl acetate	1793.03±236.42a	879.93±86.56b	649.66±101.65c	3513.39±167.39d	897.49±130.17b	1000.17±89.16b
Hexyl acetate	75.49±3.62a	50.77±1.77bc	48.74±1.78b	103.37±7.5d	49.77±0.97b	54.72±4.44c
Phenethyl acetate	592.37±80.49a	311.56±37.76b	233.11±31.64c	760.83±129.7d	346.54±29.96b	369.14±54.54b
Total acetate esters	51297.21±3981.45a	38644.85±2946.46b	35808.61±4627.24b	73293.8±10902.22c	38971.41±3841.63b	35534.79±2836.35b
Medium-chain fatty acids
Hexanoic acid	47773.76±5834.41a	29699.05±3084.34b	34978.51±4420.38c	41322.62±849.58d	26980.12±2453.91be	24454.26±2219.08e
Octanoic acid	98589.74±3776.51a	58061.23±6926.02b	42556.45±4973.37c	73627.92±4035.72d	43299.7±5261.38c	22126.07±3259.16e
Decanoic acid	77234.83±3603.96a	48483.56±5616.93b	30480.05±4267.11c	42434.09±4472.64d	25337.12±3589.05e	11794.01±853.39f
Isobutyric acid	4347.69±683.33a	5040.61±748.51b	5065.23±455.53b	3755.07±443.94c	4879.12±553.86ab	4930.85±490.46ab
Total medium-chain fatty acids	224909.5±3878.73a	140444.35±15365.15b	106240.67±14685.92c	165374.38±5379.48d	100496.06±11090.87e	58125.46±3434.68c
Ethyl esters
Ethyl butanoate	180.71±9.6a	126.51±8.89b	72.58±4.34c	277.93±45.48d	117.81±12.29be	105.46±11.15e
Ethyl hexanoate	335.98±31.38a	219.4±22.01b	162.94±20.31c	528.81±67.73d	205.82±27.75b	211.26±28.85b
Ethyl octanoate	619.74±74.42a	397.47±53.15b	351.04±55.95b	395.2±93.44b	408.8±52.02b	380.99±53.86b
Ethyl decanoate	1934.98±215.46a	1486.38±213.73bc	1563.39±208.04b	1018.58±78.01d	1329.04±148.65c	1530.26±180.12b
Ethyl dodecanoate	347.55±35.96a	283.04±27.86b	493.78±56.31c	196.13±17.38d	235.61±29.76e	465.57±32.25c
Ethyl tetradecanoate	38.7±0.82ab	35.98±1.56a	46.45±5.1c	41.44±4.77b	36.89±1.44a	42.63±2.71b
Ethyl hexadecanoate	58.26±4.37a	54.28±4.38ab	53.23±4.7ab	66.46±5.82c	53.97±3.41ab	51.98±6.57b
Total ethyl esters	3488.83±273.53a	2446.36±302.33bc	2692.64±243.67b	1923.24±113.09d	2282.61±347.22c	2532.14±286.69bc
Other esters
Methyl octanoate	6161.09±829.85a	5675.94±601.67b	3609.65±460.65cd	3319.07±351.14c	3536.2±193.05cd	3920.06±465.92d
Isoamyl hexanoate	5.6±0.11a	5.39±0.2a	5.77±0.23ab	6.11±0.44bc	5.61±0.11a	6.17±0.53c
Isoamyl octanoate	7.75±0.54a	7.33±0.52a	12.32±1.18b	9.29±0.58c	7.55±0.42a	13.1±2.04b
Total other esters	6215.59±863.93a	5738.27±604.56b	3847.83±277.15cd	3371.53±417.65c	3596.59±192.97cd	3985.01±456.51d
Terpene & norisoprenoids
Citronellol	122.69±2.13a	122.39±1.98a	121.26±2a	122.89±2.3a	122.73±1.24a	121.16±1.29a
β-Damascenone	218.57±12.02ab	231.98±25.61abc	205.01±19.47a	259.31±12.93c	247.94±21.44c	238.19±35.1bc
Total terpene & norisoprenoids	341.26±13.11ab	354.37±26.93abc	326.27±20.49a	383.51±11.61c	370.67±21.57bc	359.35±36.28bc
Others
3-(Methylthio)-1-propanol	1135.48±137.91a	1718.22±118.15b	1726.97±221.29b	2963.49±375.67c	1753.73±235.79b	3684.05±238.89d
Values (mean ± SD, n = 3) of the same parameter (compound) followed with the same lowercase letters indicate no significant difference (P< 0.05, Duncan’s test). Bold numbers indicate the concentration is above its threshold.
